# Supplementary figures and images for: Changes in circulating 25-hydroxyvitamin D according to vitamin D binding protein genotypes after vitamin D3 or D2supplementation
Source: Springer Nature journal article supplement (doi:10.1186/1475-2891-12-39), 2013-04-04

### Total 25(OH)D

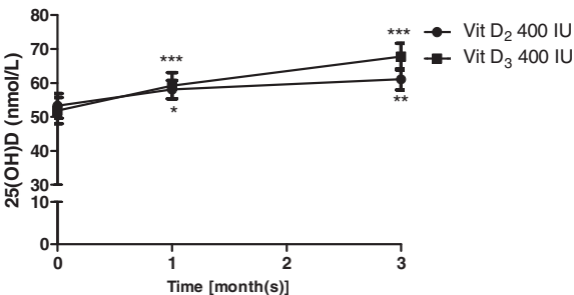

### 25(OH)D<sub>2</sub>

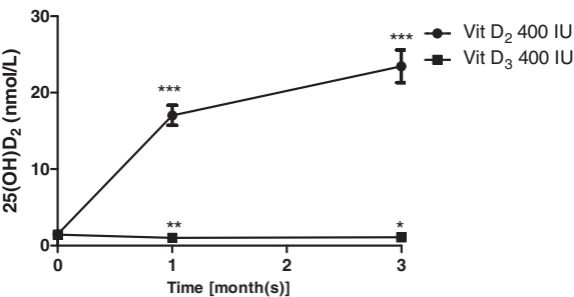

### 25(OH)D<sub>3</sub>

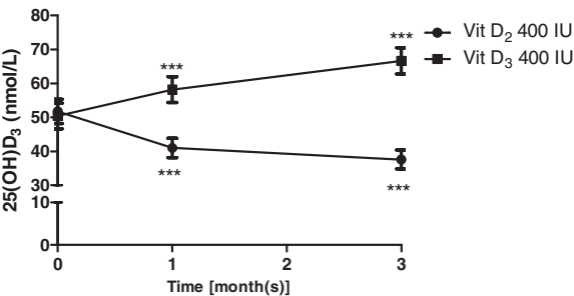

Supplement: 12937_2012_624_MOESM1_ESM.pdf [file 12937_2012_624_MOESM1_ESM.pdf]

### $\Delta$ Total 25(OH)D

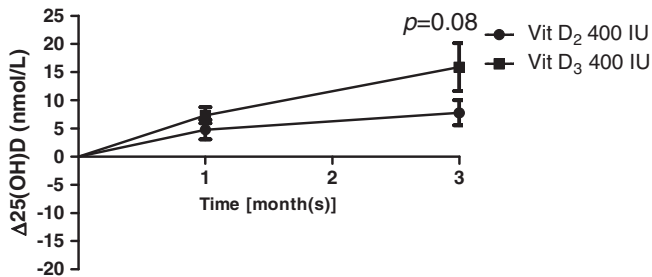

### $\Delta$ 25(OH)D<sub>2</sub>

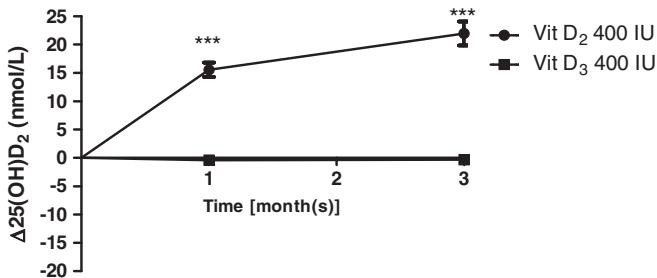

### $\Delta$ 25(OH)D<sub>3</sub>

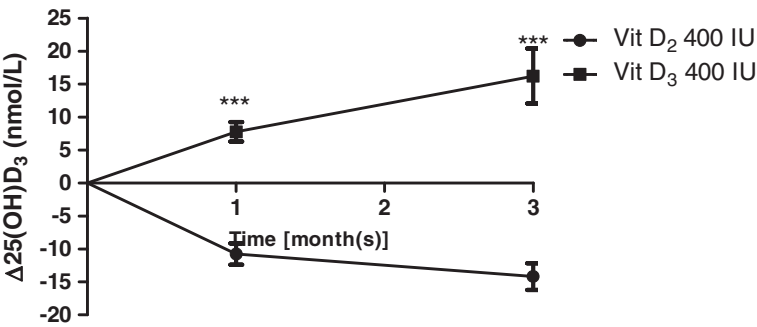

Supplement: 12937_2012_624_MOESM2_ESM.pdf [file 12937_2012_624_MOESM2_ESM.pdf]
